# Supplementary material
Source: PubMed Central journal article supplement (PMC5335814)
Supplement: Supp_Table1.pdf [file Supp_Table1.pdf]

## Supplementary Data

SUPPLEMENTARY TABLE S1. PRIMERS USED FOR POLYMERASE CHAIN REACTION  
AMPLIFICATION OF HIV-1 NEAR FULL-LENGTH GENOMES

| <i>Name</i> | <i>Hxb2 position</i> | <i>Region</i> | <i>Sequence (5'-3')</i>                           |
|-------------|----------------------|---------------|---------------------------------------------------|
| JA153       | 683–707              | p17           | CTCTCGACGCAGGACTCGGCTTGCT                         |
| P17-894F    | 894–913              | p17           | ATGGGCAAGCAGGGAGCTGG                              |
| P17-913R    | 913–894              | p17           | CCAGTCCCTGCTTGCCCAT                               |
| P24-1300F   | 1300–1324            | p24           | ATACCCATGTTT(A/T)CAGCATTATCAG                     |
| JA155 (R)   | 1324–1300            | p24           | CTGATAATGCTGAAAACATGGGTAT                         |
| P24-1818F   | 1818–1838            | p24           | AGAAGAAATGATGACAGCATG                             |
| P24-1838R   | 1838–1818            | p24           | CATGCTGTCATCATTTCTTCT                             |
| IBPR1.1     | 2008–2030            | gag NC        | AAAAGGGCTGTTGGAAATGTGG                            |
| IBPR2.2     | 2733–2712            | RT            | GCAAATACTGGAGT(A/G)TT(G/A)TATG                    |
| IBPR3.1     | 2119–2140            | gag P1-P6     | AGGCCAGGGAATTT(T/C)C(T/C)TCAGA                    |
| IB2621PR4   | 2591–2621            | PR            | AATGCTTTTTATTTT(C/T)TCTTCTGTCAATGGC               |
| IBRT1       | 2487–2505            | RT            | CCTACACCTGTCAACATAA                               |
| IBRT2       | 3649–3630            | RT            | TGTTTTACATCATTAGTGTG                              |
| IBRT3       | 2542–2560            | RT            | TAAATTTTCCAATTAGTCC                               |
| IBRT4       | 3579–3560            | RT            | TAAATTTGATATGTCCATG                               |
| RT3482FI    | 3482–3509            | RT            | AGAACCAGTACATGGRGTTATATTATGA                      |
| IB3626RT2   | 3626–3593            | RT            | TCCGTTAA(C/T)TGT(C/T)TTACATCATT<br>AGTGTG(A/G)GCA |
| RT3864F     | 3864–3881            | RT            | CAACAAATCA(A/G)AAGACTG                            |
| P15-3881R   | 3881–3864            | p15           | CAGTCTT(T/C)TGATTTGTG                             |
| P15-4176F   | 4176–4194            | p15           | GGAGGAAATGAACAAGTAG                               |
| P15-4194R   | 4194–4176            | p15           | CTACTTGTTCATTTCCCTCC                              |
| P31-4658F   | 4658–4675            | p31           | CAATCCCCAAAGTCAAGG                                |
| P31-4675R   | 4675–4658            | p31           | CCTTGACTTTGGGGATTG                                |
| Vif5041F    | 5041–5059            | vif           | ATGGAAAACAGATGGCAGG                               |
| Vif5059R    | 5059–5041            | vif           | CCTGCCATCTGTTTTCCAT                               |
| Vif5461F    | 5461–5476            | vif           | AAGGTAGGATC(T/C)(T/C)TAC                          |
| Vif5476R    | 5476–5461            | vif           | GTA(A/G)(A/G)GATCCTACCTT                          |
| PBENV1      | 5968–5986            | REV           | CTATGGCAGGAAGAAGCGG                               |
| REV5986R    | 5986–5968            | REV           | CCGCTTCTTCCTGCCATAG                               |
| ENV6223RI   | 6223–6203            | REV           | CCACTGTCTTCTGCTCTTTC                              |
| PBENV2      | 6203–6223            | REV           | GAAAGAGCAGAAGAYAGTGGC                             |
| ENV8637FI   | 8637–8657            | gp41          | CAGGAACTAAAGAATAGTGC                              |
| PBENV4      | 8797A8817            | NEF           | TTTTGACCACTTGCCCHCCCAT                            |
| PBENV3      | 9036–9016            | NEF           | AGTCATTGGTCTTARAGGTAC                             |
| NEF9532RI   | 9532–9511            | 3'LTR         | GCGAAAAGCRGCTGCTTATAT                             |
